# Supplementary material for: EGFR-HIF1α signaling positively regulates the differentiation of IL-9 producing T helper cells
Source: PubMed Central journal article supplement (PMC8169867; doi:10.1038/s41467-021-23042-x), 2021-06-01
Supplement: 41467_2021_23042_MOESM2_ESM.pdf [file 41467_2021_23042_MOESM2_ESM.pdf]

## **Description of Additional Supplementary Files**

**Supplementary Data 1:** Coding for RNAseq analysis: The R code was for downstream analysis for which we have used this in-house script as indicated in supplementary data1. Using the in-house script, we further processed the data, then plotted the heatmap and PCA plot from RNAseq analysis.
